# Supplementary material for: Spatiotemporal dynamics of membrane remodeling and fusion proteins during endocytic transport
Source: PubMed Central journal article supplement — Mol Biol Cell. 2015 Apr 1;26(7):1357–70. doi: 10.1091/mbc.E14-08-1318 (PMC4454181; doi:10.1091/mbc.e14-08-1318), 2015-04-01
Supplement: supp_E14-08-1318v1_CombinedSupMats.pdf [file supp_E14-08-1318v1_CombinedSupMats.pdf]

# Supplemental Materials

*Molecular Biology of the Cell*

Arlt et al.
